# Supplementary material
Source: MDPI journal article supplement (https://www.mdpi.com/2304-6732/10/12/1303)
Supplement: s1 [file s1]

# Supplementary Materials: Second Harmonic Generation Versus Linear Magneto-Optical Response Studies of Laser-Induced Switching of Pinning Effects in Antiferromagnetic/Ferromagnetic Films

Irina A. Kolmychek<sup>1</sup> , Vladimir B. Novikov<sup>1</sup> , Nikita S. Gusev<sup>2</sup>, Igor Yu. Pashen'kin<sup>2</sup>, Evgeny A. Karashtin<sup>2</sup>  and Tatiana V. Murzina<sup>1</sup> \*

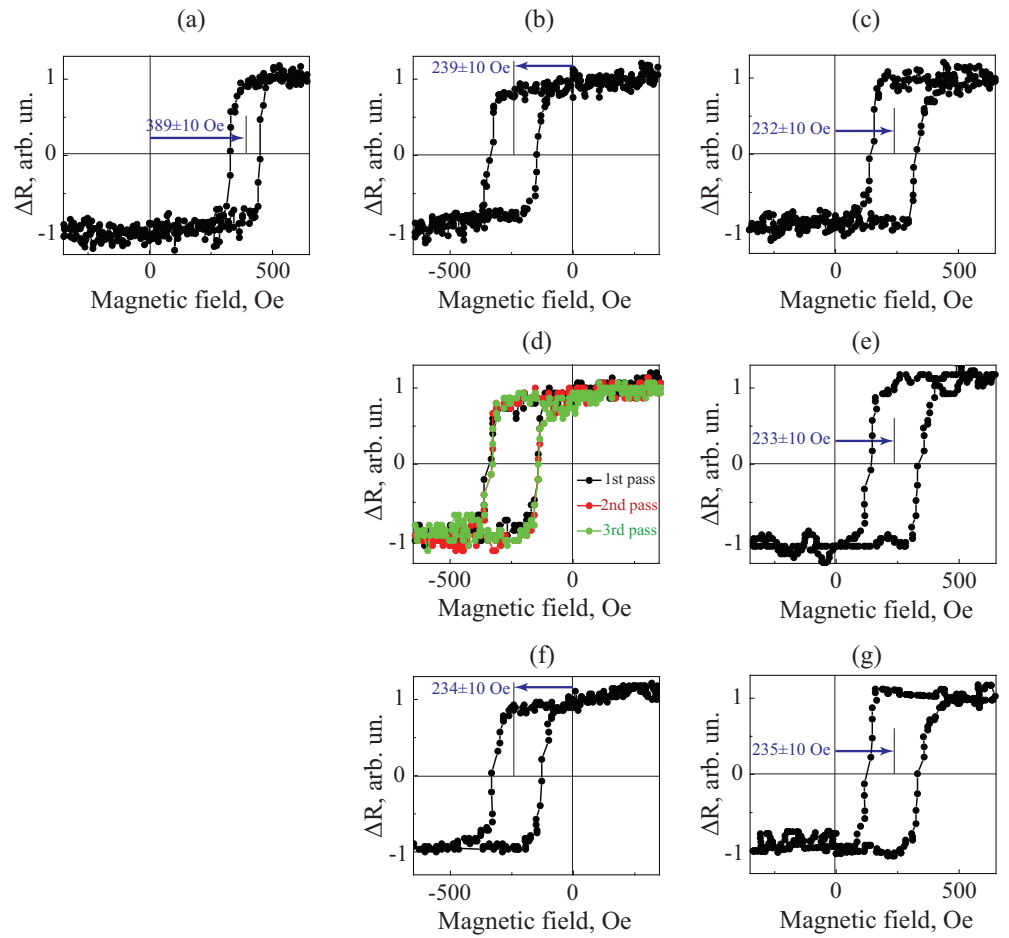

**Figure S1.** MOKE hysteresis loops obtained for (a) as-prepared film, (b) area of the sample after the first cooling in the positive field, (c) area of the sample after the first cooling in the negative field, (d) area of the sample after the second cooling in the positive field, points of different colour demonstrate several consecutive measurements, (e) area of the sample after the second cooling in the negative field, (f) area of the sample after the third cooling in the positive field, (g) area of the sample after the third cooling in the negative field. Magnetic field was applied parallel to the initial pinning direction and perpendicular to the plane of light incidence,  $d_{\text{CoFe}}=4$  nm. All the data were normalized to maximum values.

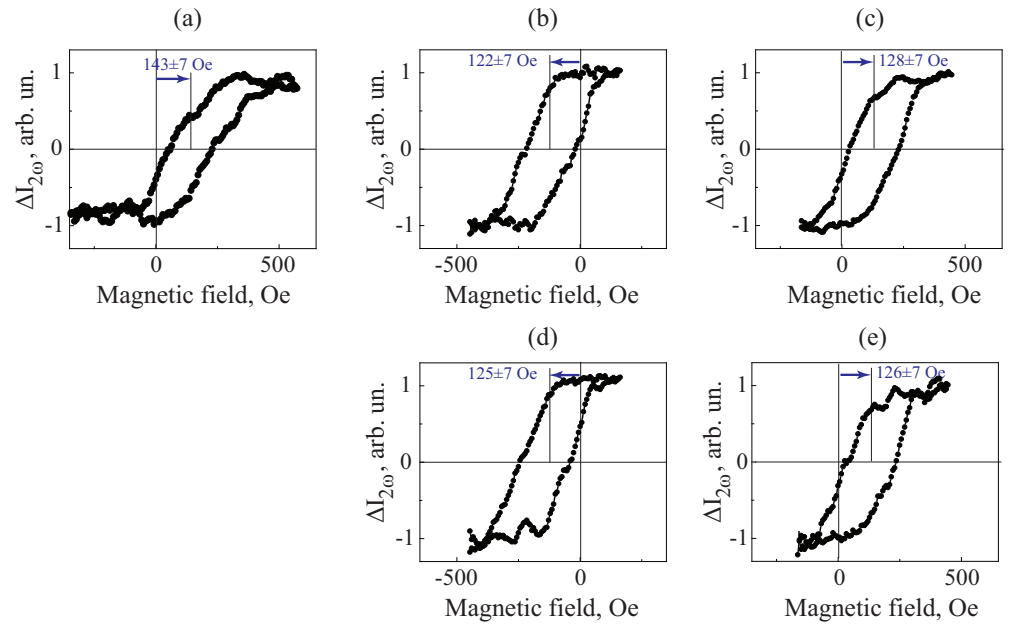

**Figure S2.** SHG hysteresis loops obtained for (a) as-prepared film, (b) area of the sample after the first cooling in the positive field, (c) area of the sample after the first cooling in the negative field, (d) area of the sample after the second cooling in the positive field, (e) area of the sample after the second cooling in the negative field. Magnetic field was applied parallel to the initial pinning direction and perpendicular to the plane of light incidence,  $d_{\text{CoFe}}=4$  nm. All the data were normalized to maximum values.
